# Supplementary material for: Metagenomic Insights into the Bacterial Functions of a Diesel-Degrading Consortium for the Rhizoremediation of Diesel-Polluted Soil
Source: MDPI journal article supplement (doi:10.3390/genes10060456), 2019-06-14
Supplement: s1 [file s1]

**Supplementary Table S3.** Enzymes identified, and genus assignment retrieved from the metagenome of the diesel-degrading bacterial consortium

| Contig ID                                                  | Start  | End    | Strand | Size (bp) | Relevant closest relative<br>Organism   % identity   % coverage | Genus assignment       |
|------------------------------------------------------------|--------|--------|--------|-----------|-----------------------------------------------------------------|------------------------|
| Alkyl group hydroxylases                                   |        |        |        |           |                                                                 |                        |
| Alkane-1 monooxygenase (EC 1.14.15.3)                      |        |        |        |           |                                                                 |                        |
| 6                                                          | 166087 | 167259 | +      | 1173      | <i>Pseudomonas mendocina</i> ymp   84%   93%                    | <i>Pseudomonas</i>     |
| 10                                                         | 173320 | 174468 | +      | 1149      | <i>Pseudomonas aeruginosa</i> DK2   100%   100%                 | <i>Pseudomonas</i>     |
| 28                                                         | 200801 | 201937 | -      | 1137      | <i>Pseudomonas aeruginosa</i> Pa58   86%   95%                  | <i>Pseudomonas</i>     |
| 155                                                        | 32852  | 34018  | +      | 1167      | <i>Aquabacterium parvum</i> B6   64%   99%*                     | <i>Aquabacterium</i>   |
| 213                                                        | 6803   | 7966   | +      | 1164      | <i>Pseudomonas</i> sp. HAR-UPW-AIA-41   75%   97%*              | <i>Pseudomonas</i>     |
| 213                                                        | 8720   | 9907   | -      | 1188      | <i>Aquabacterium parvum</i> B6   96%   100%*                    | <i>Aquabacterium</i>   |
| 213                                                        | 12868  | 13122  | -      | 255       | <i>Aquabacterium parvum</i> B6   94%   94%*                     | <i>Aquabacterium</i>   |
| 257                                                        | 24756  | 25889  | +      | 1134      | <i>Pseudomonas aeruginosa</i> Pa1242   100%   100%              | <i>Pseudomonas</i>     |
| 2908                                                       | 2582   | 3685   | +      | 1104      | <i>Sphingobium</i> sp. PNB   100%   100%                        | <i>Shingobium</i>      |
| 6706                                                       | 194    | 1090   | -      | 897       | <i>Sphingomonas</i> sp. P2   100%   100%                        | <i>Sphingomonas</i>    |
| Total                                                      |        |        |        |           |                                                                 | 10                     |
| Long-chain alkane monooxygenase (EC 1.14.14.5)             |        |        |        |           |                                                                 |                        |
| 1                                                          | 175638 | 176786 | -      | 1149      | <i>Pseudomonas aeruginosa</i> C-NN2   100%   100%               | <i>Pseudomonas</i>     |
| 10                                                         | 141266 | 142348 | +      | 1083      | <i>Pseudomonas aeruginosa</i> NHmuc   100%   100%               | <i>Pseudomonas</i>     |
| 10                                                         | 143312 | 144394 | +      | 1083      | <i>Pseudomonas aeruginosa</i> Ocean-1155   100%   100%          | <i>Pseudomonas</i>     |
| 28                                                         | 61150  | 62298  | -      | 1149      | <i>Pseudomonas resinovorans</i> NBRC 106553   92%   98%         | <i>Pseudomonas</i>     |
| 49                                                         | 124320 | 125399 | +      | 1080      | <i>Pseudomonas aeruginosa</i> PA83   99%   100%                 | <i>Pseudomonas</i>     |
| 70                                                         | 59224  | 60369  | +      | 1146      | <i>Pseudomonas aeruginosa</i> Pa84   100%   100%                | <i>Pseudomonas</i>     |
| 76                                                         | 81011  | 81949  | +      | 939       | <i>Novosphingobium</i> sp. AP12   82%   100%*                   | <i>Novosphingobium</i> |
| 76                                                         | 81964  | 83118  | +      | 1155      | <i>Sphingomonas</i> sp. MM-1   77%   96%                        | <i>Sphingomonas</i>    |
| 142                                                        | 56674  | 57831  | +      | 1158      | <i>Pseudomonas resinovorans</i> NBRC 106553   92%   97%         | <i>Pseudomonas</i>     |
| 189                                                        | 34214  | 35338  | -      | 1125      | -                                                               | Unassigned             |
| 336                                                        | 8193   | 9386   | +      | 1194      | <i>Rhizobacter gummiphilus</i> NS21   86%   96%                 | <i>Rhizobacter</i>     |
| 429                                                        | 17394  | 18482  | +      | 1089      | <i>Sphingobium</i> sp. YBL2   85%   97%                         | <i>Sphingobium</i>     |
| 609                                                        | 9134   | 10231  | -      | 1098      | <i>Sphingomonas taxi</i> ATCC 55669   81%   98%                 | <i>Sphingomonas</i>    |
| 616                                                        | 13791  | 14888  | +      | 1098      | <i>Cupriavidus nantongensis</i> X1   93%   100%                 | <i>Cupriavidus</i>     |
| 662                                                        | 117    | 1109   | +      | 993       | <i>Pseudomonas citronellolis</i> SJTE-3   83%   97%             | <i>Pseudomonas</i>     |
| 698                                                        | 4296   | 5387   | -      | 1092      | <i>Bordetella pseudohinzii</i> HI4681   81%   97%               | <i>Bordetella</i>      |
| 1242                                                       | 3909   | 5108   | +      | 1200      | <i>Mesorhizobium loti</i> TONO   77%   86%                      | <i>Mesorhizobium</i>   |
| 1557                                                       | 2241   | 3302   | -      | 1062      | <i>Rhizobium leguminosarum</i> Vaf-108   76%   95%              | <i>Rhizobium</i>       |
| 2589                                                       | 1108   | 2271   | -      | 1164      | <i>Cupriavidus</i> sp. N-1   92%   100%                         | <i>Cupriavidus</i>     |
| 8833                                                       | 16     | 1425   | +      | 1410      | <i>Caulobacter segnis</i> ATCC 21756   85%   77%                | <i>Caulobacter</i>     |
| 16274                                                      | 61     | 978    | +      | 918       | <i>Xanthobacter autotrophicus</i> Py2   81%   99%               | <i>Xanthobacter</i>    |
| 27781                                                      | 487    | 750    | -      | 264       | <i>Delftia acidovorans</i> ANG1   99%   100%                    | <i>Delftia</i>         |
| 31735                                                      | 537    | 686    | -      | 150       | <i>Bordetella hinzii</i> H568   85%   70%                       | <i>Bordetella</i>      |
| 32955                                                      | 233    | 652    | -      | 420       | <i>Niveispirillum cyanobacteriorum</i> TH16   97 %   66%*       | <i>Niveispirillum</i>  |
| 40409                                                      | 128    | 595    | +      | 468       | <i>Cupriavidus nantongensis</i> X1   83%   55%                  | <i>Cupriavidus</i>     |
| 40618                                                      | 41     | 571    | -      | 531       | <i>Sphingomonas</i> sp. 66-10   81%   100%*                     | <i>Sphingomonas</i>    |
| 80049                                                      | 11     | 277    | +      | 267       | <i>Achromobacter xylosoxidans</i> NCTC10807   98%   100%        | <i>Achromobacter</i>   |
| 85652                                                      | 103    | 381    | -      | 279       | <i>Niveispirillum cyanobacteriorum</i> TH16   91 %   100%*      | <i>Niveispirillum</i>  |
| 91760                                                      | 5      | 253    | +      | 249       | <i>Cupriavidus</i> sp. USMAA1020   79%   63%                    | <i>Cupriavidus</i>     |
| Total                                                      |        |        |        |           |                                                                 | 29                     |
| Cytochrome P450 / Alkane hydroxylase (EC 1.14.--)          |        |        |        |           |                                                                 |                        |
| 9078                                                       | 387    | 1643   | -      | 1257      | <i>Sphingobium macrogoltabida</i> HXN-200   97%   100%          | <i>Sphingobium</i>     |
| 2344                                                       | 2533   | 3798   | +      | 1266      | <i>Parvibaculum lamentivorans</i> DS-1   77%   96%              | <i>Parvibaculum</i>    |
| 323                                                        | 1307   | 2560   | +      | 1254      | <i>Parvibaculum lamentivorans</i> DS-1   94%   100%             | <i>Parvibaculum</i>    |
| 2593                                                       | 3099   | 4364   | +      | 1266      | <i>Parvibaculum lamentivorans</i> DS-1   98%   100%             | <i>Parvibaculum</i>    |
| 1052                                                       | 2737   | 4002   | +      | 1266      | <i>Parvibaculum lamentivorans</i> DS-1   96%   100%             | <i>Parvibaculum</i>    |
| 445                                                        | 2891   | 4171   | +      | 1281      | <i>Parvibaculum lamentivorans</i> DS-1   90%   86%              | <i>Parvibaculum</i>    |
| 1645                                                       | 1782   | 3035   | -      | 1254      | <i>Cupriavidus</i> sp. K31   76%   72%                          | <i>Cupriavidus</i>     |
| 84                                                         | 45064  | 46602  | +      | 1539      | -                                                               | Unassigned             |
| Total                                                      |        |        |        |           |                                                                 | 8                      |
| Methane, Butane and Propane Monooxygenases (EC 1.14.13.25) |        |        |        |           |                                                                 |                        |
| 662                                                        | 9850   | 11511  | +      | 1661      | <i>Methylibium petroleiphillum</i> PM1   92%   99%              | <i>Methylibium</i>     |
| Total                                                      |        |        |        |           |                                                                 | 1                      |
| Extradiol aromatic-ring-cleavage dioxygenases              |        |        |        |           |                                                                 |                        |
| Catechol 2,3-dioxygenase (EC 1.13.11.2)                    |        |        |        |           |                                                                 |                        |
| 94                                                         | 3098   | 4000   | -      | 903       | <i>Sphingomonas sanxanigenens</i> NX02   84%   99%              | <i>Sphingomonas</i>    |
| 286                                                        | 28935  | 29837  | +      | 903       | <i>Sphingomonas sanxanigenens</i> NX02   84%   100%             | <i>Sphingomonas</i>    |
| 1168                                                       | 10485  | 11480  | -      | 996       | <i>Delftia tsuruhatensis</i> CM13   77%   90%                   | <i>Delftia</i>         |
| 1320                                                       | 3582   | 4535   | -      | 954       | -                                                               | Unassigned             |
| 1985                                                       | 6151   | 7095   | -      | 945       | <i>Variovorax boronicumulans</i> J1   78%   84%                 | <i>Variovorax</i>      |
| 2305                                                       | 119    | 1060   | -      | 942       | -                                                               | Unassigned             |
| 2395                                                       | 5777   | 6283   | +      | 507       | <i>Variovorax boronicumulans</i> J1   83%   93%                 | <i>Variovorax</i>      |
| 2880                                                       | 2921   | 3865   | +      | 945       | <i>Variovorax boronicumulans</i> J1   78%   84%                 | <i>Variovorax</i>      |
| 3266                                                       | 2093   | 3016   | +      | 924       | <i>Sphingomonas</i> sp. DN1   99%   100%                        | <i>Sphingomonas</i>    |
| 13885                                                      | 77     | 1054   | +      | 978       | <i>Delftia tsuruhatensis</i> CM13   99%   100%                  | <i>Delftia</i>         |
| 39506                                                      | 421    | 612    | -      | 192       | -                                                               | Unassigned             |
| 68221                                                      | 73     | 201    | +      | 129       | <i>Variovorax boronicumulans</i> J1   97%   100%                | <i>Variovorax</i>      |
| 4176                                                       | 1509   | 2411   | +      | 903       | -                                                               | Unassigned             |

|                                                           |        |        |   |      |                                                          |                         |
|-----------------------------------------------------------|--------|--------|---|------|----------------------------------------------------------|-------------------------|
| 4512                                                      | 1967   | 2509   | + | 543  | <i>Variovorax</i> sp. HW608   76%   76%                  | <i>Variovorax</i>       |
| 35292                                                     | 22     | 579    | + | 558  | <i>Variovorax paradoxus</i> B4                           | <i>Variovorax</i>       |
| 57                                                        | 13059  | 13472  | - | 414  | <i>Pseudomonas resinovorans</i> NBRC 106553   84%   94%  | <i>Pseudomonas</i>      |
| 148                                                       | 17832  | 18767  | + | 936  | <i>Sphingobium</i> sp. EP60837   81%   94%               | <i>Sphingobium</i>      |
|                                                           |        |        |   |      | Total                                                    | 17                      |
| Biphenyl-2,3-diol 1,2-dioxygenase (EC 1.13.11.39)         |        |        |   |      |                                                          |                         |
| 31                                                        | 61506  | 62048  | - | 543  | -                                                        | Unassigned              |
| 547                                                       | 9686   | 10630  | + | 945  | -                                                        | Unassigned              |
| 820                                                       | 9954   | 10424  | - | 471  | <i>Achromobacter xylosoxidans</i> A8   80%   94%         | <i>Achromobacter</i>    |
| 877                                                       | 4763   | 5326   | - | 564  | -                                                        | Unassigned              |
| 1144                                                      | 9750   | 10322  | - | 573  | -                                                        | Unassigned              |
| 2260                                                      | 2755   | 3234   | - | 480  | <i>Acidovorax avenae</i> ATCC 19869   82%   95%          | <i>Acidovorax</i>       |
| 2322                                                      | 146    | 616    | - | 471  | -                                                        | Unassigned              |
| 32214                                                     | 86     | 664    | + | 579  | <i>Sphingopyxis</i> sp. UC10   95%   100%                | <i>Sphingopyxis</i>     |
| 32                                                        | 165870 | 166250 | - | 381  | <i>Pseudomonas aeruginosa</i> NHmuc   100%   100%        | <i>Pseudomonas</i>      |
| 1650                                                      | 2193   | 2573   | + | 381  | <i>Achromobacter denitrificans</i> PR1   99%   100%      | <i>Achromobacter</i>    |
| 2007                                                      | 3764   | 4144   | - | 381  | <i>Alicyclophilus denitrificans</i> K601   83%   96%     | <i>Alicyclophilus</i>   |
| 31                                                        | 70052  | 71191  | + | 1140 | -                                                        | Unassigned              |
| 1124                                                      | 4188   | 5087   | - | 900  | <i>Sphingobium</i> sp. PNB   99%   100%                  | <i>Sphingobium</i>      |
| 1283                                                      | 7482   | 8438   | + | 957  | <i>Burkholderia cepacia</i> R34   76%   98%              | <i>Burkholderia</i>     |
| 1824                                                      | 4253   | 5152   | + | 900  | <i>Sphingomonas</i> sp. DN1   100%   100%                | <i>Sphingomonas</i>     |
| 2335                                                      | 943    | 1527   | - | 585  | <i>Cupriavidus basilensis</i> 4G11   82%   90%           | <i>Cupriavidus</i>      |
| 3841                                                      | 1379   | 2311   | - | 933  | <i>Bordetella</i> sp. SCN 67-23   94%   98%*             | <i>Bordetella</i>       |
| 46718                                                     | 168    | 563    | - | 396  | <i>Parvibaculum lavamentivorans</i> DS-1   100%   100%   | <i>Parvibaculum</i>     |
| 68805                                                     | 73     | 399    | + | 327  | -                                                        | Unassigned              |
| 85055                                                     | 109    | 339    | - | 231  | <i>Phenylobacterium</i> sp. Root1277   91%   100%        | <i>Phenylobacterium</i> |
| 36                                                        | 199468 | 200358 | + | 891  | <i>Pseudomonas resinovorans</i> NBRC 106553   89%   100% | <i>Pseudomonas</i>      |
| 532                                                       | 10366  | 11280  | + | 915  | <i>Sphingobium</i> sp. EP60837   81%   98%               | <i>Sphingobium</i>      |
| 746                                                       | 5908   | 6789   | + | 882  | -                                                        | Unassigned              |
| 1382                                                      | 8342   | 9307   | + | 966  | <i>Bordetella</i> sp. SCN 67-23   94%   100%*            | <i>Bordetella</i>       |
| 1730                                                      | 5146   | 5973   | + | 828  | <i>Bordetella</i> sp. SCN 67-23   87%   100%*            | <i>Bordetella</i>       |
| 16922                                                     | 14     | 1048   | - | 1035 | <i>Acidovorax</i> sp. KKS102   98%   100%                | <i>Acidovorax</i>       |
| 22706                                                     | 19     | 429    | + | 411  | <i>Achromobacter denitrificans</i> A41   87%   100%      | <i>Achromobacter</i>    |
|                                                           |        |        |   |      | Total                                                    | 27                      |
| 3-carboxyethylcatechol 2,3-dioxygenase (EC 1.13.11.16)    |        |        |   |      |                                                          |                         |
| 544                                                       | 3324   | 4283   | + | 960  | <i>Bordetella</i> sp. SCN 67-23   94%   99%*             | <i>Bordetella</i>       |
| 621                                                       | 12338  | 13423  | + | 1086 | -                                                        | Unassigned              |
| 715                                                       | 10683  | 11630  | + | 948  | -                                                        | Unassigned              |
| 1036                                                      | 9719   | 10693  | - | 975  | <i>Achromobacter denitrificans</i> PR1   99%   100%      | <i>Achromobacter</i>    |
| 1946                                                      | 6387   | 7481   | + | 1095 | <i>Bordetella</i> sp. SCN 67-23   98%   100%*            | <i>Bordetella</i>       |
| 1984                                                      | 7205   | 7546   | - | 342  | <i>Bordetella</i> sp. SCN 67-23   96%   100%*            | <i>Bordetella</i>       |
| 6446                                                      | 1021   | 2094   | - | 1074 | <i>Bordetella</i> sp. SCN 67-23  96%   100%              | <i>Bordetella</i>       |
|                                                           |        |        |   |      | Total                                                    | 7                       |
| 3-hydroxyanthranilate 3,4-dioxygenase (EC 1.13.11.6)      |        |        |   |      |                                                          |                         |
| 25                                                        | 29738  | 30268  | + | 531  | <i>Dockdonella koreensis</i> DS-123   91%   97%          | <i>Dockdonella</i>      |
| 141                                                       | 2980   | 3552   | + | 573  | <i>Pseudomonas</i> sp. St29   89%   97%                  | <i>Pseudomonas</i>      |
| 1169                                                      | 5910   | 6461   | + | 552  | <i>Achromobacter denitrificans</i> PR1   97%   96%       | <i>Achromobacter</i>    |
| 4136                                                      | 1703   | 2212   | + | 510  | <i>Bordetella</i> sp. SCN 67-23*                         | <i>Bordetella</i>       |
| 4675                                                      | 2913   | 3260   | - | 348  | <i>Pseudorhodoferax</i> sp. Leaf265   95%   100%*        | <i>Pseudorhodoferax</i> |
| 4751                                                      | 453    | 986    | + | 534  | <i>Bordetella</i> sp. SCN 67-23*                         | <i>Bordetella</i>       |
| 7407                                                      | 244    | 765    | + | 522  | <i>Stenotrophomonas maltophilia</i> AA1   96%   100%     | <i>Stenotrophomonas</i> |
| 21428                                                     | 99     | 620    | + | 522  | <i>Sphingopyxis macrogoltabida</i> EY-1   84%   99%      | <i>Sphingopyxis</i>     |
| 28435                                                     | 138    | 467    | + | 330  | <i>Sphingopyxis macrogoltabida</i> 203N   97%   100%     | <i>Sphingopyxis</i>     |
| 61133                                                     | 11     | 241    | + | 231  | <i>Achromobacter xylosoxidans</i> NCTC10807   99%   100% | <i>Achromobacter</i>    |
|                                                           |        |        |   |      | Total                                                    | 10                      |
| 3-O-methylgallate 3,4-dioxygenase (EC 1.13.11.-)          |        |        |   |      |                                                          |                         |
| 1545                                                      | 8101   | 9036   | - | 936  | <i>Bordetella</i> sp. SCN 67-23   95%   100%*            | <i>Bordetella</i>       |
| 108283                                                    | 45     | 317    | + | 273  | <i>Novosphingobium</i> sp. Leaf2   76%   100%            | <i>Novosphingobium</i>  |
|                                                           |        |        |   |      | Total                                                    | 2                       |
| 2,3-dihydrphenylpropionate 1,2-dioxygenase (EC 1.13.11.-) |        |        |   |      |                                                          |                         |
| 106971                                                    | 54     | 356    | - | 303  | <i>Pseudomonas putida</i> GM4FR   87%   100%             | <i>Pseudomonas</i>      |
|                                                           |        |        |   |      | Total                                                    | 1                       |
| 4,5-DOPA dioxygenase (EC 1.14.99.-)                       |        |        |   |      |                                                          |                         |
| 159                                                       | 42000  | 42377  | + | 378  | <i>Pseudomonas aeruginosa</i> Pa127   100%   100%        | <i>Pseudomonas</i>      |
| 2257                                                      | 5322   | 5675   | - | 354  | <i>Achromobacter denitrificans</i> PR1   99%   100%      | <i>Achromobacter</i>    |
| 3101                                                      | 3005   | 3388   | + | 384  | <i>Achromobacter xylosoxidans</i> FDAARGOS   77%   84%   | <i>Achromobacter</i>    |
| 69822                                                     | 28     | 351    | + | 324  | -                                                        | Unassigned              |
| 2874                                                      | 5077   | 5349   | - | 273  | <i>Bordetella</i> sp. SCN 67-23   96%   100%*            | <i>Bordetella</i>       |
| 3                                                         | 44413  | 44781  | + | 369  | <i>Pseudomonas resinovorans</i> NBRC 106553   86%   93%  | <i>Pseudomonas</i>      |
|                                                           |        |        |   |      | Total                                                    | 6                       |
| 2-aminophenol-1,6-dioxygenase (EC 1.13.11.n1)             |        |        |   |      |                                                          |                         |
| 340                                                       | 24548  | 25366  | + | 819  | <i>Achromobacter denitrificans</i> PR1   99%   100%      | <i>Achromobacter</i>    |
| 7580                                                      | 1107   | 1919   | - | 813  | <i>Bordetella</i> sp. SCN 67-23   96%   100%*            | <i>Bordetella</i>       |
| 27574                                                     | 1      | 411    | + | 411  | <i>Achromobacter xylosoxidans</i> A8   93%   100%        | <i>Achromobacter</i>    |
|                                                           |        |        |   |      | Total                                                    | 3                       |
| Protocatechuate 4,5-dioxygenase (EC 1.13.11.8)            |        |        |   |      |                                                          |                         |
| 244                                                       | 25742  | 26197  | - | 456  | <i>Sphingobium</i> sp. C1   87%   98%                    | <i>Sphingobium</i>      |
| 1334                                                      | 63     | 521    | - | 459  | <i>Delftia</i> sp. Cs1-4   99%   100%                    | <i>Delftia</i>          |
| 2020                                                      | 1809   | 2174   | + | 366  | -                                                        | Unassigned              |

|                                                            |        |        |   |      |                                                             |                         |
|------------------------------------------------------------|--------|--------|---|------|-------------------------------------------------------------|-------------------------|
| 3015                                                       | 493    | 855    | - | 363  | -                                                           | Unassigned              |
| 3471                                                       | 697    | 1143   | - | 447  | <i>Variovorax</i> sp. HW608   87%   89%                     | <i>Variovorax</i>       |
| 5183                                                       | 18     | 281    | + | 264  | <i>Delftia acidovorax</i> ANG1   99%   100%                 | <i>Delftia</i>          |
| 12427                                                      | 746    | 1186   | - | 441  | <i>Delftia tsuruhatensis</i> CM13   89%   96%               | <i>Delftia</i>          |
| 79107                                                      | 61     | 375    | - | 315  | <i>Delftia tsuruhatensis</i> CM13   99%   100%              | <i>Delftia</i>          |
| Total                                                      |        |        |   |      |                                                             | 8                       |
| 3,4-dihydroxyphenylacetate 2,3-dioxygenase (EC 1.13.11.15) |        |        |   |      |                                                             |                         |
| 170                                                        | 29369  | 30379  | + | 1011 | <i>Achromobacter denitrificans</i> PR1   99%   100%         | <i>Achromobacter</i>    |
| 6                                                          | 68470  | 69393  | + | 924  | <i>Pseudomonas resinovorans</i> NBRC 106553   90%   99%     | <i>Pseudomonas</i>      |
| 43                                                         | 85211  | 86134  | - | 924  | <i>Pseudomonas aeruginosa</i> X78812   100%   100%          | <i>Pseudomonas</i>      |
| 441                                                        | 7258   | 8109   | + | 852  | <i>Achromobacter denitrificans</i> PR1   99%   100%         | <i>Achromobacter</i>    |
| 1518                                                       | 6227   | 7105   | - | 879  | <i>Acidovorax avenae</i> ATCC 19860   82%   97%             | <i>Acidovorax</i>       |
| 66678                                                      | 158    | 436    | - | 279  | <i>Comamonas</i> sp. SCN 65-56   83%   100%*                | <i>Comamonas</i>        |
| 70311                                                      | 21     | 239    | + | 219  | <i>Achromobacter xylosoxidans</i> FDAARGOS   99%   100%     | <i>Achromobacter</i>    |
| Total                                                      |        |        |   |      |                                                             | 7                       |
| Intradiol aromatic-ring-cleavage dioxygenases              |        |        |   |      |                                                             |                         |
| Catechol 1,2-dioxygenase (EC 1.13.11.1)                    |        |        |   |      |                                                             |                         |
| 10                                                         | 254071 | 255003 | + | 933  | <i>Pseudomonas aeruginosa</i> NHmuc   100%   100%           | <i>Pseudomonas</i>      |
| 89                                                         | 65651  | 66580  | - | 930  | <i>Pseudomonas pseudoalcaligenes</i> KF707   87%   94%      | <i>Pseudomonas</i>      |
| 313                                                        | 28152  | 29072  | + | 921  | <i>Sphingobium</i> sp. TKS   87%   99%                      | <i>Sphingobium</i>      |
| 503                                                        | 1138   | 2058   | - | 921  | <i>Novosphingobium resinovorum</i> SA1   88%   95%          | <i>Novosphingobium</i>  |
| 2619                                                       | 1214   | 2083   | + | 870  | <i>Bordetella</i> sp. SCN 67-23   98%   100%*               | <i>Bordetella</i>       |
| 2693                                                       | 3014   | 3889   | + | 876  | <i>Burkholderia cenocepacia</i> VC1254   77%   97%          | <i>Burkholderia</i>     |
| 3582                                                       | 3094   | 4014   | + | 921  | <i>Cupriavidus nantongensis</i> X1   95%   100%             | <i>Cupriavidus</i>      |
| 5050                                                       | 743    | 1693   | + | 951  | <i>Bordetella</i> sp. SCN 67-23   95%   99%*                | <i>Bordetella</i>       |
| 54674                                                      | 264    | 398    | - | 135  | <i>Mesorhizobium loti</i>   76%   95%*                      | <i>Mesorhizobium</i>    |
| 70999                                                      | 86     | 415    | - | 330  | <i>Bosea thiooxidans</i> CGMCC 9174   100%   100%*          | <i>Bosea</i>            |
| 95825                                                      | 179    | 304    | - | 126  | <i>Mesorhizobium ciceri</i> WSM1271   78%   100%*           | <i>Mesorhizobium</i>    |
| 111855                                                     | 145    | 300    | - | 156  | <i>Achromobacter insolitus</i> DSM 23807   96%   100%       | <i>Achromobacter</i>    |
| 447                                                        | 23817  | 24689  | + | 873  | <i>Achromobacter denitrificans</i> PR1   99%   100%         | <i>Achromobacter</i>    |
| 32983                                                      | 56     | 634    | + | 579  | <i>Variovorax paradoxus</i> EPS   92%   96%                 | <i>Variovorax</i>       |
| 37018                                                      | 38     | 481    | + | 444  | <i>Achromobacter xylosoxidans</i> A8   92%   99%            | <i>Achromobacter</i>    |
| 40315                                                      | 6      | 512    | + | 507  | -                                                           | Unassigned              |
| Total                                                      |        |        |   |      |                                                             | 16                      |
| Protocatechuate 3,4-dioxygenase (EC 1.13.11.3)             |        |        |   |      |                                                             |                         |
| 87                                                         | 49809  | 50414  | - | 606  | <i>Pseudomonas aeruginosa</i> M28A1   100%   100%           | <i>Pseudomonas</i>      |
| 470                                                        | 9873   | 10478  | - | 606  | <i>Pseudomonas pseudoalcaligenes</i> KF707   88%   100%     | <i>Pseudomonas</i>      |
| 1861                                                       | 2746   | 3315   | + | 570  | <i>Cupriavidus nantongensis</i> X1   93%   100%             | <i>Cupriavidus</i>      |
| 4543                                                       | 1592   | 2176   | - | 585  | <i>Ralstonia solanacearum</i> CFBP2957   81%   85%          | <i>Ralstonia</i>        |
| 8475                                                       | 363    | 926    | - | 564  | <i>Stenotrophomonas maltophilia</i> AA1   93%   100%        | <i>Stenotrophomonas</i> |
| 818                                                        | 4952   | 5842   | - | 891  | <i>Novosphingobium</i> sp. P6W   85%   100%*                | <i>Novosphingobium</i>  |
| 6186                                                       | 581    | 1507   | + | 927  | <i>Delftia</i> sp. HK171   98%   100%                       | <i>Delftia</i>          |
| Total                                                      |        |        |   |      |                                                             | 7                       |
| Oher aromatic-ring-cleavage dioxygenases                   |        |        |   |      |                                                             |                         |
| Gentisate 1,2-dioxygenase (EC 1.13.11.4)                   |        |        |   |      |                                                             |                         |
| 10                                                         | 290582 | 291643 | - | 1062 | <i>Pseudomonas aeruginosa</i> DK2   100%   100%             | <i>Pseudomonas</i>      |
| 240                                                        | 37602  | 38678  | + | 1077 | <i>Achromobacter denitrificans</i> PR1   99%   100%         | <i>Achromobacter</i>    |
| 269                                                        | 337    | 1461   | - | 1125 | <i>Achromobacter denitrificans</i> PR1   99%   100%         | <i>Achromobacter</i>    |
| 539                                                        | 10893  | 11945  | + | 1053 | <i>Achromobacter denitrificans</i> PR1   99%   100%         | <i>Achromobacter</i>    |
| 639                                                        | 2558   | 3604   | + | 1047 | -                                                           | Unassigned              |
| 810                                                        | 1202   | 2392   | - | 1191 | <i>Acidovorax avenae</i> ATCC 19860   83%   89%             | <i>Acidovorax</i>       |
| 999                                                        | 3394   | 4518   | + | 1125 | <i>Variovorax</i> sp. HW608   81%   96%                     | <i>Variovorax</i>       |
| 1250                                                       | 27     | 221    | + | 195  | <i>Bordetella</i> sp. SCN 67-23   98%   100%*               | <i>Bordetella</i>       |
| 1687                                                       | 997    | 2028   | - | 1032 | <i>Bordetella</i> sp. SCN 67-23   97%   100%*               | <i>Bordetella</i>       |
| 1852                                                       | 31     | 153    | + | 123  | <i>Cupriavidus nantongensis</i> X1   98%   100%             | <i>Cupriavidus</i>      |
| 4783                                                       | 2758   | 3216   | - | 459  | <i>Acidovorax</i> sp. KKS102   97%   95%                    | <i>Acidovorax</i>       |
| 5573                                                       | 1865   | 2377   | - | 513  | <i>Acidovorax wautersii</i> DSM 27981   75%   98%*          | <i>Acidovorax</i>       |
| 5758                                                       | 100    | 1026   | + | 927  | <i>Achromobacter ruhlandii</i> SCCH3:ACH   85%   100%       | <i>Achromobacter</i>    |
| 14794                                                      | 11     | 238    | + | 228  | <i>Cupriavidus</i> sp. UYPR2.512   81%   100%*              | <i>Cupriavidus</i>      |
|                                                            |        |        |   |      | <i>Achromobacter xylosoxidans</i> NH44784-1996   96%   100% | <i>Achromobacter</i>    |
| 16309                                                      | 16     | 726    | + | 711  |                                                             |                         |
| 17111                                                      | 75     | 1043   | - | 969  | <i>Delftia tsuruhatensis</i> CM13   98%   100%              | <i>Delftia</i>          |
| 32039                                                      | 331    | 645    | - | 315  | <i>Cupriavidus</i> sp. USMAA1020   84%   97%                | <i>Cupriavidus</i>      |
| 32821                                                      | 37     | 639    | + | 603  | <i>Ensifer sojae</i> CCBAU 05684   80%   95%                | <i>Ensifer</i>          |
| 98422                                                      | 31     | 318    | - | 288  | <i>Sphingopyxis macrogoltabida</i> 203N   93%   100%        | <i>Sphingopyxis</i>     |
| Total                                                      |        |        |   |      |                                                             | 19                      |
| Homogentisate 1,2-dioxygenase (EC 1.13.11.5)               |        |        |   |      |                                                             |                         |
| 7                                                          | 13333  | 14520  | + | 1188 | <i>Chryseobacterium</i> sp. StRB126   84%   96%             | <i>Chryseobacterium</i> |
| 49                                                         | 25979  | 27277  | - | 1299 | <i>Pseudomonas aeruginosa</i> NHmuc   100%   100%           | <i>Pseudomonas</i>      |
| 54                                                         | 115589 | 116878 | - | 1290 | <i>Sphingobium</i> sp. C1   82%   97%                       | <i>Sphingobium</i>      |
| 81                                                         | 107824 | 109131 | - | 1308 | <i>Dokdonella koreensis</i> DS-123   88%   98%              | <i>Dokdonella</i>       |
| 145                                                        | 20513  | 21841  | + | 1329 | <i>Sphingomonas hengshuiensis</i> WHSC-8   82%   95%        | <i>Sphingomonas</i>     |
| 254                                                        | 33500  | 34792  | + | 1293 | <i>Pseudomonas citronellolis</i> P3B5   89%   98%           | <i>Pseudomonas</i>      |
| 614                                                        | 21     | 1352   | + | 1332 | <i>Burkholderia gladioli</i> BSR3   83%   96%               | <i>Burkholderia</i>     |
| 908                                                        | 2956   | 4290   | + | 1335 | -                                                           | Unassigned              |
| 938                                                        | 11318  | 12652  | - | 1335 | <i>Variovorax</i> sp. HW608   85%   96%                     | <i>Variovorax</i>       |
| 1516                                                       | 6842   | 8140   | - | 1299 | <i>Achromobacter denitrificans</i> PR1   99%   100%         | <i>Achromobacter</i>    |
| 1823                                                       | 7634   | 8041   | - | 408  | <i>Bordetella hinzii</i> NCTC13200   83%   87%              | <i>Bordetella</i>       |

|                                                                  |        |        |   |      |                                                        |                  |
|------------------------------------------------------------------|--------|--------|---|------|--------------------------------------------------------|------------------|
| 3847                                                             | 97     | 1416   | + | 1320 | Cupriavidus taiwanensis LMG19424   96%   99%           | Cupriavidus      |
| 7226                                                             | 1140   | 2117   | - | 978  | Pseudomonas oryzae KCTC 32247   78%   86%              | Pseudomonas      |
| 9750                                                             | 972    | 1433   | - | 462  | Legionella hackeliae 798-PA-H   81%   96%*             | Legionella       |
| 12169                                                            | 50     | 169    | + | 120  | Stenotrophomonas maltophilia NCTC10257   96%   100%    | Stenotrophomonas |
|                                                                  |        |        |   |      | Stenotrophomonas acidaminiphila ZAC14D2   93%   100%   | Stenotrophomonas |
| 15096                                                            | 23     | 370    | + | 348  |                                                        |                  |
| 25559                                                            | 94     | 396    | + | 303  | Chryseobacterium sp. 36-9   100%   100%*               | Chryseobacterium |
| 28434                                                            | 23     | 667    | + | 645  | Rhodospirillum centenum SW   83%   97%                 | Rhodospirillum   |
| 58142                                                            | 32     | 487    | - | 456  | Variovorax boronicummulans J1   95%   100%             | Variovorax       |
|                                                                  |        |        |   |      | Total                                                  | 19               |
| Ring-hydroxylating dioxygenases                                  |        |        |   |      |                                                        |                  |
| Anthranilate / Ortho-halobenzoate 1,2-dioxygenase (EC 1.14.12.1) |        |        |   |      |                                                        |                  |
| 10                                                               | 248828 | 250222 | - | 1395 | Pseudomonas aeruginosa W45909   99%   100%             | Pseudomonas      |
| 331                                                              | 4188   | 5498   | - | 1311 | Bordetella bronchiseptica I328   83%   97%             | Bordetella       |
| 614                                                              | 9931   | 11118  | - | 1188 | Pseudomonas aeruginosa PP4   99%   91%                 | Pseudomonas      |
| 999                                                              | 87     | 257    | + | 171  | Hydrogenophaga sp. T4   86%   78%*                     | Hydrogenophaga   |
| 1974                                                             | 6226   | 7485   | - | 1260 | Cupriavidus sp. USMAA2-4   75%   95%                   | Cupriavidus      |
| 2429                                                             | 1892   | 3145   | - | 1254 | Hydrogenophaga sp. PBC   78%   91%                     | Hydrogenophaga   |
| 3141                                                             | 1827   | 3134   | + | 1308 | Pigmentiphaga sp. NDS-2   97%   100%                   | Pigmentiphaga    |
| 4439                                                             | 1931   | 3226   | + | 1296 | Cupriavidus basilensis 4G11   85%   90%                | Cupriavidus      |
| 6331                                                             | 818    | 2056   | - | 1239 | -                                                      | Unassigned       |
| 18612                                                            | 792    | 962    | - | 171  | Variovorax paradoxus B4   85%   100%                   | Variovorax       |
| 33891                                                            | 65     | 604    | + | 540  | -                                                      | Unassigned       |
|                                                                  |        |        |   |      | Total                                                  | 11               |
| Benzoate 1,2-dioxygenase (EC 1.14.12.10)                         |        |        |   |      |                                                        |                  |
| 35                                                               | 196596 | 197720 | + | 1125 | Pseudomonas resinovorans NBRC 106553   82%   97%       | Pseudomonas      |
| 130                                                              | 64866  | 65900  | + | 1035 | -                                                      | Unassigned       |
| 1342                                                             | 20     | 346    | + | 327  | Cupriavidus sp. NH9   98%   100%                       | Cupriavidus      |
| 9867                                                             | 132    | 1358   | - | 1227 | Sinorhizobium sp. RAC02   87%   98%                    | Sinorhizobium    |
| 6                                                                | 11347  | 12738  | + | 1392 | Pseudomonas resinovorans NBRC 106553   89%   98%       | Pseudomonas      |
| 645                                                              | 10636  | 11979  | - | 1344 | Bordetella sp. SCN 67-23   96%   99%*                  | Bordetella       |
| 929                                                              | 3123   | 4445   | - | 1323 | Bordetella sp. SCN 67-23   98%   99%*                  | Bordetella       |
| 2832                                                             | 2663   | 3859   | + | 1197 | Bordetella sp. SCN 67-23   96%   99%*                  | Bordetella       |
| 3622                                                             | 6      | 1094   | + | 1089 | Bordetella sp. SCN 67-23   98%   100%*                 | Bordetella       |
| 9022                                                             | 373    | 1587   | - | 1215 | Bordetella sp. SCN 67-23   96%   99%*                  | Bordetella       |
| 1052                                                             | 4824   | 5099   | - | 276  | Parvibaculum lavamentivorans DS-1   85% 64%*           | Parvibaculum     |
| 1124                                                             | 5319   | 6737   | + | 1419 | Sphingobium sp. PNB   100%   100%                      | Sphingobium      |
| 1382                                                             | 5661   | 6908   | - | 1248 | Bordetella sp. SCN 67-23   97%   100%*                 | Bordetella       |
| 1824                                                             | 2551   | 3888   | - | 1338 | Sphingomonas sp. DN1   99%   100%                      | Sphingomonas     |
| 4332                                                             | 44     | 949    | + | 906  | -                                                      | Unassigned       |
|                                                                  |        |        |   |      | Total                                                  | 15               |
| Naphthalene 1,2-dioxygenase (EC 1.14.12.12)                      |        |        |   |      |                                                        |                  |
| 73                                                               | 110789 | 112057 | + | 1269 | Sphingomonas wittichii RW1   79%   94%                 | Sphingomonas     |
| 466                                                              | 20834  | 22153  | + | 1320 | Sphingomonas flavimaris SMR4y   88%   100%             | Sphingomonas     |
| 493                                                              | 7477   | 8664   | + | 1188 | Sphingomonas sp. LH128   100%   100%                   | Sphingomonas     |
| 890                                                              | 235    | 1581   | - | 1347 | Sphingomonas sp. P2   100%   100%                      | Spingomonas      |
| 1164                                                             | 2      | 520    | + | 519  | Bordetella sp. SCN 67-23   98%   100%*                 | Bordetella       |
| 1565                                                             | 4776   | 6128   | + | 1353 | Sphingomonas sp. Km187   100%   100%                   | Sphingomonas     |
| 1565                                                             | 6674   | 8041   | + | 1368 | Sphingobium sp. PNB   100%   100%                      | Sphingobium      |
| 3181                                                             | 2872   | 4236   | + | 1365 | Sphingobium yanoikuyae B1   100%   100%                | Sphingobium      |
| 9595                                                             | 75     | 953    | + | 879  | Bordetella sp. SCN 67-23   96%   100%*                 | Bordetella       |
|                                                                  |        |        |   |      | Total                                                  | 9                |
| 2-halobenzoate 1,2-dioxygenase (EC 1.14.12.13)                   |        |        |   |      |                                                        |                  |
| 313                                                              | 29097  | 30452  | + | 1356 | Sphingobium sp. TKS   90%   100%                       | Sphingobium      |
| 497                                                              | 12138  | 13484  | + | 1347 | Achromobacter denitrificans PR1   99%   100%           | Achromobacter    |
| 810                                                              | 8207   | 9538   | - | 1332 | Achromobacter sp. MFA1 R4   77%   91%                  | Achromobacter    |
| 2567                                                             | 5693   | 5971   | - | 279  | Novosphingobium resinovorum SA1   88%   86%            | Novosphingobium  |
| 12681                                                            | 8      | 907    | + | 900  | Bordetella sp. SCN 67-23   97%   98%*                  | Bordetella       |
| 48945                                                            | 329    | 538    | - | 210  | Variovorax boronicummulans J1   93%   95%              | Variovorax       |
|                                                                  |        |        |   |      | Total                                                  | 6                |
| Biphenyl 2,3-dioxygenase (EC 1.14.12.18)                         |        |        |   |      |                                                        |                  |
|                                                                  |        |        |   |      | Novosphingobium aromaticivorans DSM 12444   99%   100% | Novosphingobium  |
| 493                                                              | 16568  | 16978  | + | 411  |                                                        |                  |
| 2111                                                             | 3684   | 4115   | - | 432  | Novosphingobium sp. PP1Y   98%   96%                   | Novosphingobium  |
| 9656                                                             | 847    | 1257   | + | 411  | Comamonas testosteroni P19   89%   100%                | Comamonas        |
| 89                                                               | 74526  | 75800  | - | 1275 | Pseudomonas pseudoalcaliigenes KF707   95%   100%      | Pseudomonas      |
| 1124                                                             | 8215   | 9495   | + | 1281 | Sphingobium sp. PNB   100%   100%                      | Sphingobium      |
| 1824                                                             | 6034   | 7302   | + | 1269 | Sphingomonas sp. DN1   100%   100%                     | Sphingomonas     |
|                                                                  |        |        |   |      | Total                                                  | 6                |
| 3-phenylpropanoate dioxygenase (EC 1.14.12.19)                   |        |        |   |      |                                                        |                  |
| 281                                                              | 18169  | 19488  | - | 1320 | Achromobacter denitrificans PR1   99%   100%           | Achromobacter    |
| 598                                                              | 12742  | 14088  | - | 1347 | Achromobacter denitrificans PR1   99%   100%           | Achromobacter    |
| 666                                                              | 15671  | 16831  | - | 1161 | Achromobacter xylosoxidans MN001   99%   100%          | Achromobacter    |
|                                                                  |        |        |   |      | Total                                                  | 3                |
| p-cumate 2,3-dioxygenase (EC 1.14.12.25)                         |        |        |   |      |                                                        |                  |
| 30                                                               | 172310 | 173620 | - | 1311 | Paraburkholderia xenovorans LB400   79%   90%          | Paraburkholderia |
| 49                                                               | 115435 | 116709 | + | 1275 | Pseudomonas aeruginosa W60856   100%   100%            | Pseudomonas      |
| 131                                                              | 7034   | 8308   | + | 1275 | -                                                      | Unassigned       |
|                                                                  |        |        |   |      | Total                                                  | 3                |

| Other/Putative/Unclassified ring-hydroxylating dioxygenases |       |       |   |      |                                                            |                        |
|-------------------------------------------------------------|-------|-------|---|------|------------------------------------------------------------|------------------------|
| 45                                                          | 85972 | 87132 | - | 1161 | <i>Pseudomonas resinovorans</i> NBRC 106553   84%   96%    | <i>Pseudomonas</i>     |
| 125                                                         | 39321 | 40610 | + | 1290 | <i>Sphingobium</i> sp. RAC03   75%   99%                   | <i>Sphingobium</i>     |
| 216                                                         | 48582 | 49055 | - | 474  | <i>Acidovorax avenae</i> ATCC 19860   83%   95%            | <i>Acidovorax</i>      |
| 220                                                         | 44610 | 45680 | - | 1071 | <i>Sphingobium herbicidovorans</i> HM   80%   99%          | <i>Sphingobium</i>     |
| 267                                                         | 32963 | 34300 | - | 1338 | <i>Novosphingobium resinovorum</i> SA1   88%   99%         | <i>Novosphingobium</i> |
| 422                                                         | 10966 | 12327 | - | 1362 | <i>Achromobacter denitrificans</i> PR1   99%   100%        | <i>Achromobacter</i>   |
| 425                                                         | 1443  | 2912  | + | 1470 | <i>Novosphingobium</i> sp. AP12   94%   98%*               | <i>Novosphingobium</i> |
| 490                                                         | 15279 | 16445 | - | 1167 | <i>Novosphingobium</i> sp. AP12   93%   100%*              | <i>Novosphingobium</i> |
| 500                                                         | 10911 | 12266 | - | 1356 | <i>Sphingomonas</i> sp. S5-249   76%   98%*                | <i>Sphingomonas</i>    |
| 602                                                         | 11513 | 12823 | - | 1311 | <i>Variovorax</i> sp. Root473   81%   100%*                | <i>Variovorax</i>      |
| 642                                                         | 13369 | 14799 | + | 1431 | <i>Novosphingobium resinovorum</i> SA1   88%   98%         | <i>Novosphingobium</i> |
| 1039                                                        | 3758  | 4933  | + | 1176 | <i>Rhodoferax</i> sp. DCY110   85%   95%                   | <i>Rhodoferax</i>      |
| 1246                                                        | 5545  | 6534  | - | 990  | -                                                          | Unassigned             |
| 1613                                                        | 6046  | 7422  | + | 1377 | <i>Novosphingobium resinovorum</i> SA1   84%   99%         | <i>Novosphingobium</i> |
| 1656                                                        | 1746  | 2972  | - | 1227 | -                                                          | Unassigned             |
| 2067                                                        | 1896  | 2999  | - | 1104 | <i>Cupriavidus nantongensis</i> X1   97%   100%            | <i>Cupriavidus</i>     |
| 2472                                                        | 445   | 1782  | - | 1338 | <i>Sphingobium</i> sp. RAC03   84%   98%                   | <i>Sphingobium</i>     |
| 2593                                                        | 1674  | 2825  | + | 1152 | <i>Parvibaculum lamentivorans</i> DS-1   99%   99%*        | <i>Parvibaculum</i>    |
| 3751                                                        | 2511  | 3572  | + | 1062 | <i>Bordetella</i> sp. SCN 67-23   95%   100%*              | <i>Bordetella</i>      |
| 4409                                                        | 2037  | 3437  | - | 1401 | -                                                          | Unassigned             |
| 4723                                                        | 2040  | 3107  | - | 1068 | <i>Sphingobium</i> sp. MI1205   80%   96%                  | <i>Sphingobium</i>     |
| 7358                                                        | 23    | 346   | + | 324  | <i>Acidovorax</i> sp. KKS102   93%   90%                   | <i>Acidovorax</i>      |
| 8191                                                        | 1465  | 1890  | - | 426  | <i>Novosphingobium</i> sp. AP12   95%   88%*               | <i>Novosphingobium</i> |
| 10438                                                       | 706   | 1410  | - | 705  | -                                                          | Unassigned             |
| 11469                                                       | 829   | 1281  | - | 453  | <i>Achromobacter xylosoxidans</i> NH44784-1996   85%   93% | <i>Achromobacter</i>   |
| 11804                                                       | 810   | 1271  | - | 462  | <i>Bordetella</i> sp. SCN 67-23   96%   100%*              | <i>Bordetella</i>      |
| 45485                                                       | 20    | 205   | + | 186  | <i>Labrys</i> sp. WJW   97%   100%*                        | <i>Labrys</i>          |
| 30504                                                       | 76    | 624   | + | 549  | -                                                          | Unassigned             |
| 8205                                                        | 1599  | 1844  | - | 246  | -                                                          | Unassigned             |
| 1124                                                        | 2042  | 3304  | - | 1263 | <i>Sphingobium</i> sp. PNB   99%   100%                    | <i>Sphingobium</i>     |
| Total                                                       |       |       |   |      |                                                            | 30                     |

\*Blastp was used instead blastn for genus assignation, as blastn did not show any significant hits.
