# Supplementary material for: Metagenomic Insights into the Bacterial Functions of a Diesel-Degrading Consortium for the Rhizoremediation of Diesel-Polluted Soil
Source: MDPI journal article supplement (doi:10.3390/genes10060456), 2019-06-14
Supplement: s1 [file s1]

Supplementary Table S1.

Relative abundance of the 16S rRNA sequences at different taxonomic levels retrieved from the diversity analysis of the 16S rRNA.

| Taxonomic classification               | Relative abundance (%) |                |                |                |                |                |
|----------------------------------------|------------------------|----------------|----------------|----------------|----------------|----------------|
|                                        | Diesel                 | Hexane         | Heptadecane    | Tetracosane    | Phenanthrene   | Naphthalene    |
| <b>Bacteria</b>                        | <b>100.000</b>         | <b>100.000</b> | <b>100.000</b> | <b>100.000</b> | <b>100.000</b> | <b>100.000</b> |
| <b>Acetothermia</b>                    | <b>0.000</b>           | <b>0.000</b>   | <b>0.000</b>   | <b>0.000</b>   | <b>0.000</b>   | <b>0.005</b>   |
| <i>Acetothermia</i>                    | 0.000                  | 0.000          | 0.000          | 0.000          | 0.000          | 0.005          |
| <b>uncultured bacterium</b>            | <b>0.000</b>           | <b>0.000</b>   | <b>0.000</b>   | <b>0.000</b>   | <b>0.000</b>   | <b>0.005</b>   |
| <b>Acidobacteria</b>                   | <b>0.149</b>           | <b>0.000</b>   | <b>0.000</b>   | <b>0.000</b>   | <b>0.000</b>   | <b>0.005</b>   |
| <i>Acidobacteria</i>                   | 0.149                  | 0.000          | 0.000          | 0.000          | 0.000          | 0.000          |
| <b>Solibacterales</b>                  | <b>0.149</b>           | <b>0.000</b>   | <b>0.000</b>   | <b>0.000</b>   | <b>0.000</b>   | <b>0.000</b>   |
| <i>Solibacteraceae (Subgroup 3)</i>    | 0.149                  | 0.000          | 0.000          | 0.000          | 0.000          | 0.000          |
| <i>Bryobacter</i>                      | 0.121                  | 0.000          | 0.000          | 0.000          | 0.000          | 0.000          |
| <i>Paludibaculum</i>                   | 0.029                  | 0.000          | 0.000          | 0.000          | 0.000          | 0.000          |
| <i>Thermoanaerobaculia</i>             | 0.000                  | 0.000          | 0.000          | 0.000          | 0.000          | 0.005          |
| <b>Thermoanaerobaculales</b>           | <b>0.000</b>           | <b>0.000</b>   | <b>0.000</b>   | <b>0.000</b>   | <b>0.000</b>   | <b>0.005</b>   |
| <i>Thermoanaerobaculaceae</i>          | 0.000                  | 0.000          | 0.000          | 0.000          | 0.000          | 0.005          |
| <i>Thermoanaerobaculum</i>             | 0.000                  | 0.000          | 0.000          | 0.000          | 0.000          | 0.005          |
| <b>Actinobacteria</b>                  | <b>0.000</b>           | <b>8.695</b>   | <b>0.004</b>   | <b>0.000</b>   | <b>0.004</b>   | <b>0.000</b>   |
| <i>Actinobacteria</i>                  | 0.000                  | 8.695          | 0.004          | 0.000          | 0.004          | 0.000          |
| <b>Corynebacterales</b>                | <b>0.000</b>           | <b>8.695</b>   | <b>0.004</b>   | <b>0.000</b>   | <b>0.004</b>   | <b>0.000</b>   |
| <i>Nocardiaceae</i>                    | 0.000                  | 8.695          | 0.004          | 0.000          | 0.004          | 0.000          |
| <i>Gordonia</i>                        | 0.000                  | 8.695          | 0.004          | 0.000          | 0.004          | 0.000          |
| <b>Bacteroidetes</b>                   | <b>16.578</b>          | <b>0.064</b>   | <b>1.631</b>   | <b>4.221</b>   | <b>0.000</b>   | <b>0.005</b>   |
| <i>Bacteroidia</i>                     | 16.578                 | 0.064          | 1.631          | 4.221          | 0.000          | 0.005          |
| <b>Bacteroidales</b>                   | <b>0.000</b>           | <b>0.000</b>   | <b>0.000</b>   | <b>0.000</b>   | <b>0.000</b>   | <b>0.005</b>   |
| <i>Rikenellaceae</i>                   | 0.000                  | 0.000          | 0.000          | 0.000          | 0.000          | 0.005          |
| <i>Blvii28 wastewater-sludge group</i> | 0.000                  | 0.000          | 0.000          | 0.000          | 0.000          | 0.005          |
| <b>Chitinophagales</b>                 | <b>0.185</b>           | <b>0.000</b>   | <b>0.048</b>   | <b>0.316</b>   | <b>0.000</b>   | <b>0.000</b>   |
| <i>Chitinophagaceae</i>                | 0.185                  | 0.000          | 0.048          | 0.316          | 0.000          | 0.000          |
| <i>Filimonas</i>                       | 0.084                  | 0.000          | 0.000          | 0.313          | 0.000          | 0.000          |
| <i>Pseudoflavitalea</i>                | 0.070                  | 0.000          | 0.048          | 0.003          | 0.000          | 0.000          |
| <i>Terrimonas</i>                      | 0.031                  | 0.000          | 0.000          | 0.000          | 0.000          | 0.000          |
| <b>Cytrophagales</b>                   | <b>0.864</b>           | <b>0.000</b>   | <b>0.000</b>   | <b>0.000</b>   | <b>0.000</b>   | <b>0.000</b>   |
| <i>Spirosomaceae</i>                   | 0.864                  | 0.000          | 0.000          | 0.000          | 0.000          | 0.000          |
| <i>Dyadobacter</i>                     | 0.864                  | 0.000          | 0.000          | 0.000          | 0.000          | 0.000          |
| <b>Flavobacteriales</b>                | <b>15.338</b>          | <b>0.064</b>   | <b>0.226</b>   | <b>3.563</b>   | <b>0.000</b>   | <b>0.000</b>   |
| <i>Weeksellaceae</i>                   | 15.338                 | 0.064          | 0.226          | 3.563          | 0.000          | 0.000          |
| <i>Chryseobacterium</i>                | 15.338                 | 0.064          | 0.226          | 3.563          | 0.000          | 0.000          |
| <b>Sphingobacteriales</b>              | <b>0.191</b>           | <b>0.000</b>   | <b>1.357</b>   | <b>0.343</b>   | <b>0.000</b>   | <b>0.000</b>   |
| <i>Sphingobacteriaceae</i>             | 0.191                  | 0.000          | 1.357          | 0.343          | 0.000          | 0.000          |

|                                                           |               |               |               |               |               |               |
|-----------------------------------------------------------|---------------|---------------|---------------|---------------|---------------|---------------|
| <i>Nubsella</i>                                           | 0.191         | 0.000         | 0.010         | 0.343         | 0.000         | 0.000         |
| <i>Sphingobacterium</i>                                   | 0.000         | 0.000         | 1.347         | 0.000         | 0.000         | 0.000         |
| <b>Cyanobacteria</b>                                      | <b>0.000</b>  | <b>0.044</b>  | <b>0.116</b>  | <b>0.089</b>  | <b>0.093</b>  | <b>0.108</b>  |
| <i>Oxyphotobacteria</i>                                   | 0.000         | 0.044         | 0.116         | 0.089         | 0.093         | 0.108         |
| <b>Chloroplast</b>                                        | <b>0.000</b>  | <b>0.044</b>  | <b>0.116</b>  | <b>0.089</b>  | <b>0.093</b>  | <b>0.108</b>  |
| <b>Epsilonbacteraeota</b>                                 | <b>0.000</b>  | <b>0.000</b>  | <b>0.000</b>  | <b>0.000</b>  | <b>0.000</b>  | <b>0.052</b>  |
| <i>Campylobacteria</i>                                    | 0.000         | 0.000         | 0.000         | 0.000         | 0.000         | 0.052         |
| <b>Campylobacteriales</b>                                 | <b>0.000</b>  | <b>0.000</b>  | <b>0.000</b>  | <b>0.000</b>  | <b>0.000</b>  | <b>0.052</b>  |
| <i>Thiovulaceae</i>                                       | 0.000         | 0.000         | 0.000         | 0.000         | 0.000         | 0.052         |
| <i>Sulfuricurvum</i>                                      | 0.000         | 0.000         | 0.000         | 0.000         | 0.000         | 0.052         |
| <b>Nitrospirae</b>                                        | <b>0.000</b>  | <b>0.000</b>  | <b>0.000</b>  | <b>0.000</b>  | <b>0.000</b>  | <b>0.052</b>  |
| <i>Thermodesulfovibrionia</i>                             | 0.000         | 0.000         | 0.000         | 0.000         | 0.000         | 0.052         |
| <b>uncultured</b>                                         | <b>0.000</b>  | <b>0.000</b>  | <b>0.000</b>  | <b>0.000</b>  | <b>0.000</b>  | <b>0.052</b>  |
| <b>Proteobacteria</b>                                     | <b>83.273</b> | <b>91.197</b> | <b>98.245</b> | <b>95.690</b> | <b>99.903</b> | <b>99.769</b> |
| <i>Alphaproteobacteria</i>                                | 20.225        | 1.054         | 0.624         | 1.107         | 40.313        | 0.016         |
| <b>Azospirillales</b>                                     | <b>1.161</b>  | <b>0.000</b>  | <b>0.007</b>  | <b>0.039</b>  | <b>0.092</b>  | <b>0.009</b>  |
| <i>Azospirillaceae</i>                                    | 1.161         | 0.000         | 0.007         | 0.039         | 0.092         | 0.009         |
| <i>Azospirillum</i>                                       | 0.152         | 0.000         | 0.007         | 0.006         | 0.006         | 0.009         |
| <i>Niveispirillum</i>                                     | 1.009         | 0.000         | 0.000         | 0.032         | 0.086         | 0.000         |
| <b>Caulobacteriales</b>                                   | <b>1.442</b>  | <b>0.854</b>  | <b>0.003</b>  | <b>0.264</b>  | <b>0.006</b>  | <b>0.000</b>  |
| <i>Caulobacteraceae</i>                                   | 1.442         | 0.854         | 0.003         | 0.264         | 0.006         | 0.000         |
| <i>Brevundimonas</i>                                      | 0.178         | 0.000         | 0.000         | 0.199         | 0.000         | 0.000         |
| <i>Caulobacter</i>                                        | 0.448         | 0.000         | 0.003         | 0.066         | 0.006         | 0.000         |
| <i>Phenylobacterium</i>                                   | 0.088         | 0.854         | 0.000         | 0.000         | 0.000         | 0.000         |
| <i>unknown</i>                                            | 0.728         | 0.000         | 0.000         | 0.000         | 0.000         | 0.000         |
| <b>Parvibaculales</b>                                     | <b>3.243</b>  | <b>0.000</b>  | <b>0.000</b>  | <b>0.000</b>  | <b>0.008</b>  | <b>0.000</b>  |
| <i>Parvibaculaceae</i>                                    | 3.243         | 0.000         | 0.000         | 0.000         | 0.008         | 0.000         |
| <i>Parvibaculum</i>                                       | 3.243         | 0.000         | 0.000         | 0.000         | 0.008         | 0.000         |
| <b>Rhizobiales</b>                                        | <b>5.032</b>  | <b>0.182</b>  | <b>0.615</b>  | <b>0.797</b>  | <b>3.543</b>  | <b>0.000</b>  |
| <i>Beijerinckiaceae</i>                                   | 2.363         | 0.000         | 0.004         | 0.076         | 0.050         | 0.000         |
| <i>Bosea</i>                                              | 0.303         | 0.000         | 0.000         | 0.076         | 0.050         | 0.000         |
| <i>Camelimonas</i>                                        | 2.060         | 0.000         | 0.000         | 0.000         | 0.000         | 0.000         |
| <i>Methylobacterium</i>                                   | 0.000         | 0.000         | 0.004         | 0.000         | 0.000         | 0.000         |
| <i>Kaistiaceae</i>                                        | 0.024         | 0.000         | 0.000         | 0.000         | 0.000         | 0.000         |
| <i>Kaistia</i>                                            | 0.024         | 0.000         | 0.000         | 0.000         | 0.000         | 0.000         |
| <i>Labraceae</i>                                          | 0.031         | 0.000         | 0.323         | 0.000         | 2.458         | 0.000         |
| <i>Labrys</i>                                             | 0.031         | 0.000         | 0.323         | 0.000         | 2.458         | 0.000         |
| <i>Rhizobiaceae</i>                                       | 2.214         | 0.167         | 0.281         | 0.721         | 1.024         | 0.000         |
| <i>Allorhizobium-Neorhizobium-Pararhizobium-Rhizobium</i> | 0.468         | 0.021         | 0.141         | 0.392         | 1.016         | 0.000         |
| <i>Mesorhizobium</i>                                      | 0.013         | 0.000         | 0.000         | 0.000         | 0.000         | 0.000         |
| <i>Ochrobactrum</i>                                       | 0.470         | 0.000         | 0.118         | 0.218         | 0.009         | 0.000         |
| <i>Shinella</i>                                           | 1.196         | 0.147         | 0.022         | 0.111         | 0.000         | 0.000         |

|                                     |               |              |              |              |               |              |
|-------------------------------------|---------------|--------------|--------------|--------------|---------------|--------------|
| <i>unknown</i>                      | 0.066         | 0.000        | 0.000        | 0.000        | 0.000         | 0.000        |
| <i>Xanthobacteraceae</i>            | 0.400         | 0.015        | 0.007        | 0.000        | 0.010         | 0.000        |
| <i>Blastochloris</i>                | 0.000         | 0.000        | 0.000        | 0.000        | 0.003         | 0.000        |
| <i>Bradyrhizobium</i>               | 0.000         | 0.015        | 0.000        | 0.000        | 0.000         | 0.000        |
| <i>Rhodoplanes</i>                  | 0.000         | 0.000        | 0.003        | 0.000        | 0.000         | 0.000        |
| <i>Rhodopseudomonas</i>             | 0.040         | 0.000        | 0.004        | 0.000        | 0.008         | 0.000        |
| <i>Xanthobacter</i>                 | 0.310         | 0.000        | 0.000        | 0.000        | 0.000         | 0.000        |
| <i>unknown</i>                      | 0.051         | 0.000        | 0.000        | 0.000        | 0.000         | 0.000        |
| <b><i>Rickettsiales</i></b>         | <b>0.000</b>  | <b>0.005</b> | <b>0.000</b> | <b>0.000</b> | <b>0.006</b>  | <b>0.007</b> |
| <i>Mitochondria</i>                 | 0.000         | 0.005        | 0.000        | 0.000        | 0.006         | 0.007        |
| <i>unknown</i>                      | 0.000         | 0.005        | 0.000        | 0.000        | 0.006         | 0.007        |
| <b><i>Sneathiellales</i></b>        | <b>0.057</b>  | <b>0.000</b> | <b>0.000</b> | <b>0.000</b> | <b>0.000</b>  | <b>0.000</b> |
| <i>Sneathiellaceae</i>              | 0.057         | 0.000        | 0.000        | 0.000        | 0.000         | 0.000        |
| <i>Taonella</i>                     | 0.057         | 0.000        | 0.000        | 0.000        | 0.000         | 0.000        |
| <b><i>Sphingomonadales</i></b>      | <b>9.290</b>  | <b>0.013</b> | <b>0.000</b> | <b>0.008</b> | <b>36.659</b> | <b>0.000</b> |
| <i>Sphingomonadaceae</i>            | 9.290         | 0.013        | 0.000        | 0.008        | 36.659        | 0.000        |
| <i>Novosphingobium</i>              | 3.645         | 0.013        | 0.000        | 0.008        | 33.694        | 0.000        |
| <i>Sphingobium</i>                  | 5.195         | 0.000        | 0.000        | 0.000        | 2.965         | 0.000        |
| <i>Sphingomonas</i>                 | 0.279         | 0.000        | 0.000        | 0.000        | 0.000         | 0.000        |
| <i>Sphingopyxis</i>                 | 0.171         | 0.000        | 0.000        | 0.000        | 0.000         | 0.000        |
| <i>Gammaproteobacteria</i>          | 63.047        | 90.143       | 97.621       | 94.582       | 59.589        | 99.752       |
| <b><i>Betaproteobacteriales</i></b> | <b>29.395</b> | <b>0.003</b> | <b>5.342</b> | <b>4.301</b> | <b>5.305</b>  | <b>0.007</b> |
| <i>Burkholderiaceae</i>             | 29.388        | 0.003        | 5.342        | 4.301        | 5.305         | 0.000        |
| <i>Achromobacter</i>                | 2.453         | 0.003        | 4.427        | 2.164        | 4.451         | 0.000        |
| <i>Acidovorax</i>                   | 0.415         | 0.000        | 0.000        | 0.000        | 0.000         | 0.000        |
| <i>Aquabacterium</i>                | 22.355        | 0.000        | 0.000        | 0.000        | 0.000         | 0.000        |
| <i>Bordetella</i>                   | 0.018         | 0.000        | 0.000        | 0.000        | 0.000         | 0.000        |
| <i>Comamonas</i>                    | 0.000         | 0.000        | 0.000        | 0.013        | 0.000         | 0.000        |
| <i>Cupriavidus</i>                  | 1.150         | 0.000        | 0.011        | 0.166        | 0.854         | 0.000        |
| <i>Delftia</i>                      | 0.893         | 0.000        | 0.880        | 1.623        | 0.000         | 0.000        |
| <i>Diaphorobacter</i>               | 0.000         | 0.000        | 0.000        | 0.024        | 0.000         | 0.000        |
| <i>Hydrogenophaga</i>               | 0.079         | 0.000        | 0.000        | 0.000        | 0.000         | 0.000        |
| <i>Pigmentiphaga</i>                | 0.620         | 0.000        | 0.024        | 0.251        | 0.000         | 0.000        |
| <i>Pseudorhodoferax</i>             | 1.249         | 0.000        | 0.000        | 0.000        | 0.000         | 0.000        |
| <i>Variovorax</i>                   | 0.079         | 0.000        | 0.000        | 0.059        | 0.000         | 0.000        |
| <i>unknown</i>                      | 0.077         | 0.000        | 0.000        | 0.000        | 0.000         | 0.000        |
| <i>Gallionellaceae</i>              | 0.000         | 0.000        | 0.000        | 0.000        | 0.000         | 0.004        |
| <i>Gallionella</i>                  | 0.000         | 0.000        | 0.000        | 0.000        | 0.000         | 0.004        |
| <i>Rhodocyclaceae</i>               | 0.007         | 0.000        | 0.000        | 0.000        | 0.000         | 0.004        |
| <i>Methyloversatilis</i>            | 0.007         | 0.000        | 0.000        | 0.000        | 0.000         | 0.000        |
| <i>uncultured</i>                   | 0.000         | 0.000        | 0.000        | 0.000        | 0.000         | 0.004        |
| <b><i>Enterobacteriales</i></b>     | <b>0.011</b>  | <b>0.000</b> | <b>0.055</b> | <b>0.000</b> | <b>0.000</b>  | <b>0.000</b> |
| <i>Enterobacteriaceae</i>           | 0.011         | 0.000        | 0.055        | 0.000        | 0.000         | 0.000        |

|                                     |               |               |               |               |               |               |
|-------------------------------------|---------------|---------------|---------------|---------------|---------------|---------------|
| <i>Citrobacter</i>                  | 0.011         | 0.000         | 0.000         | 0.000         | 0.000         | 0.000         |
| <i>Enterobacter</i>                 | 0.000         | 0.000         | 0.026         | 0.000         | 0.000         | 0.000         |
| <i>unknown</i>                      | 0.000         | 0.000         | 0.029         | 0.000         | 0.000         | 0.000         |
| <b><i>Halothiobacillales</i></b>    | <b>0.000</b>  | <b>0.000</b>  | <b>0.000</b>  | <b>0.000</b>  | <b>0.000</b>  | <b>0.011</b>  |
| <i>Halothiobacillaceae</i>          | 0.000         | 0.000         | 0.000         | 0.000         | 0.000         | 0.011         |
| <i>Thiofaba</i>                     | 0.000         | 0.000         | 0.000         | 0.000         | 0.000         | 0.011         |
| <b><i>Legionellales</i></b>         | <b>1.253</b>  | <b>0.000</b>  | <b>0.000</b>  | <b>0.000</b>  | <b>0.000</b>  | <b>0.000</b>  |
| <i>Legionellaceae</i>               | 1.253         | 0.000         | 0.000         | 0.000         | 0.000         | 0.000         |
| <i>Legionella</i>                   | 1.253         | 0.000         | 0.000         | 0.000         | 0.000         | 0.000         |
| <b><i>Pseudomonadales</i></b>       | <b>27.014</b> | <b>64.915</b> | <b>88.854</b> | <b>89.249</b> | <b>53.601</b> | <b>99.720</b> |
| <i>Pseudomonadaceae</i>             | 27.014        | 64.915        | 88.854        | 89.249        | 53.601        | 99.720        |
| <i>Pseudomonas</i>                  | 27.014        | 64.915        | 88.854        | 89.249        | 53.601        | 99.720        |
| <b><i>Thiotrichales</i></b>         | <b>0.000</b>  | <b>0.000</b>  | <b>0.000</b>  | <b>0.000</b>  | <b>0.000</b>  | <b>0.014</b>  |
| <i>Thiotrichaceae</i>               | 0.000         | 0.000         | 0.000         | 0.000         | 0.000         | 0.014         |
| <i>Thiothrix</i>                    | 0.000         | 0.000         | 0.000         | 0.000         | 0.000         | 0.014         |
| <b><i>Xanthomonadales</i></b>       | <b>5.375</b>  | <b>25.226</b> | <b>3.370</b>  | <b>1.032</b>  | <b>0.684</b>  | <b>0.000</b>  |
| <i>Rhodanobacteraceae</i>           | 3.289         | 0.000         | 0.000         | 0.006         | 0.000         | 0.000         |
| <i>Dokdonella</i>                   | 3.289         | 0.000         | 0.000         | 0.006         | 0.000         | 0.000         |
| <i>Xanthomonadaceae</i>             | 2.086         | 25.226        | 3.370         | 1.026         | 0.684         | 0.000         |
| <i>Stenotrophomonas</i>             | 2.086         | 25.226        | 3.370         | 1.026         | 0.684         | 0.000         |
| <b><i>Unclassified bacteria</i></b> | <b>0.000</b>  | <b>0.000</b>  | <b>0.004</b>  | <b>0.000</b>  | <b>0.000</b>  | <b>0.004</b>  |

Relative abundance of CDSs at different taxonomic levels.

| <b>Taxonomic classification</b> | <b>Diesel</b> |
|---------------------------------|---------------|
| Bacteria                        | 98.32         |
| Actinobacteria                  | 0.33          |
| Actinobacteria                  | 0.33          |
| Corynebacteriales               | 0.08          |
| Mycobacteriaceae                | 0.03          |
| <b><i>Mycobacterium</i></b>     | 0.03          |
| Nocardiaceae                    | 0.05          |

|                          |       |
|--------------------------|-------|
| <i>Nocardia</i>          | 0.02  |
| <i>Rhodococcus</i>       | 0.03  |
| Frankiales               | 0.02  |
| Frankiaceae              | 0.02  |
| <i>Frankia</i>           | 0.02  |
| Jiangellales             | 0.01  |
| Jiangellaceae            | 0.01  |
| <i>Jiangella</i>         | 0.01  |
| Micrococcales            | 0.06  |
| Microbacteriaceae        | 0.06  |
| <i>Microbacterium</i>    | 0.06  |
| Micromonosporales        | 0.03  |
| Micromonosporaceae       | 0.03  |
| <i>Micromonospora</i>    | 0.03  |
| Pseudonocardiales        | 0.04  |
| Pseudonocardiaceae       | 0.04  |
| <i>Amycolatopsis</i>     | 0.02  |
| <i>Pseudonocardia</i>    | 0.02  |
| Streptomycetales         | 0.09  |
| Streptomycetaceae        | 0.09  |
| <i>Streptomyces</i>      | 0.09  |
| Bacteroidetes            | 4.65  |
| Cytophagia               | 1.66  |
| Cytophagales             | 1.66  |
| Cytophagaceae            | 1.66  |
| <i>Dyadobacter</i>       | 1.66  |
| Flavobacteriia           | 2.94  |
| Flavobacteriales         | 2.94  |
| Flavobacteriaceae        | 2.94  |
| <i>Chryseobacterium</i>  | 2.82  |
| <i>Elizabethkingia</i>   | 0.06  |
| <i>Flavobacteriaceae</i> | 0.02  |
| <i>Flavobacterium</i>    | 0.03  |
| <i>Polaribacter</i>      | 0.01  |
| Sphingobacteriia         | 0.04  |
| Sphingobacteriales       | 0.04  |
| Sphingobacteriaceae      | 0.04  |
| <i>Pedobacter</i>        | 0.02  |
| <i>Sphingobacterium</i>  | 0.02  |
| Deinococcus-Thermus      | 0.01  |
| Deinococci               | 0.01  |
| Deinococcales            | 0.01  |
| Deinococcaceae           | 0.01  |
| <i>Deinococcus</i>       | 0.01  |
| Proteobacteria           | 93.33 |

|                         |       |
|-------------------------|-------|
| Alphaproteobacteria     | 26.38 |
| Caulobacterales         | 2.32  |
| Caulobacteraceae        | 2.32  |
| <i>Brevundimonas</i>    | 0.28  |
| <i>Caulobacter</i>      | 1.47  |
| <i>Phenylobacterium</i> | 0.58  |
| Rhizobiales             | 10.80 |
| Aurantimonadaceae       | 0.08  |
| <i>Aureimonas</i>       | 0.05  |
| <i>Martelella</i>       | 0.03  |
| Beijerinckiaceae        | 0.03  |
| <i>Methylocella</i>     | 0.03  |
| Bradyrhizobiaceae       | 2.31  |
| <i>Afipia</i>           | 0.04  |
| <i>Bosea</i>            | 1.16  |
| <i>Bradyrhizobium</i>   | 0.75  |
| <i>Nitrobacter</i>      | 0.03  |
| <i>Oligotropha</i>      | 0.04  |
| <i>Rhodopseudomonas</i> | 0.28  |
| <i>Variibacter</i>      | 0.02  |
| Brucellaceae            | 0.46  |
| <i>Brucella</i>         | 0.08  |
| <i>Ochrobactrum</i>     | 0.38  |
| Chelatococcaceae        | 0.53  |
| <i>Chelatococcus</i>    | 0.53  |
| Hyphomicrobiaceae       | 0.20  |
| <i>Blastochloris</i>    | 0.07  |
| <i>Devosia</i>          | 0.02  |
| <i>Hyphomicrobium</i>   | 0.02  |
| <i>Rhodomicrobium</i>   | 0.01  |
| <i>Rhodoplanes</i>      | 0.07  |
| Methylobacteriaceae     | 0.74  |
| <i>Methylobacterium</i> | 0.63  |
| <i>Microvirga</i>       | 0.11  |
| Methylocystaceae        | 0.02  |
| <i>Methylocystis</i>    | 0.02  |
| Other                   | 0.04  |
| Other                   | 0.04  |
| Phyllobacteriaceae      | 0.32  |
| <i>Aminobacter</i>      | 0.04  |
| <i>Chelativorans</i>    | 0.02  |
| <i>Hoeflea</i>          | 0.01  |
| <i>Mesorhizobium</i>    | 0.25  |
| Rhizobiaceae            | 3.82  |
| <i>Agrobacterium</i>    | 0.58  |

|                           |       |
|---------------------------|-------|
| <i>Ensifer</i>            | 0.10  |
| <i>Neorhizobium</i>       | 0.07  |
| <i>Rhizobium</i>          | 0.47  |
| <i>Shinella</i>           | 1.72  |
| <i>Sinorhizobium</i>      | 0.89  |
| Rhodobiaceae              | 1.25  |
| <i>Parvibaculum</i>       | 1.25  |
| Xanthobacteraceae         | 1.02  |
| <i>Azorhizobium</i>       | 0.26  |
| <i>Starkeya</i>           | 0.15  |
| <i>Xanthobacter</i>       | 0.61  |
| Rhodobacterales           | 0.22  |
| Hyphomonadaceae           | 0.02  |
| <i>Hyphomonas</i>         | 0.02  |
| Rhodobacteraceae          | 0.21  |
| <i>Celeribacter</i>       | 0.02  |
| <i>Defluviimonas</i>      | 0.03  |
| <i>Pannonibacter</i>      | 0.03  |
| <i>Paracoccus</i>         | 0.04  |
| <i>Rhodobacter</i>        | 0.04  |
| <i>Rhodovulum</i>         | 0.01  |
| <i>Stappia</i>            | 0.02  |
| <i>Yangia</i>             | 0.01  |
| Rhodospirillales          | 1.00  |
| Acetobacteraceae          | 0.07  |
| <i>Acidiphilium</i>       | 0.02  |
| <i>Gluconacetobacter</i>  | 0.01  |
| <i>Roseomonas</i>         | 0.03  |
| Rhodospirillaceae         | 0.93  |
| <i>Azospirillum</i>       | 0.59  |
| <i>Magnetospirillum</i>   | 0.07  |
| <i>Rhodospirillum</i>     | 0.20  |
| <i>Tistrella</i>          | 0.08  |
| Sphingomonadales          | 11.96 |
| Erythrobacteraceae        | 0.12  |
| <i>Altererythrobacter</i> | 0.04  |
| <i>Croceicoccus</i>       | 0.02  |
| <i>Erythrobacter</i>      | 0.04  |
| <i>Porphyrobacter</i>     | 0.02  |
| Sphingomonadaceae         | 11.84 |
| <i>Blastomonas</i>        | 0.04  |
| <i>Citromicrobium</i>     | 0.02  |
| <i>Novosphingobium</i>    | 3.49  |
| <i>Sphingobium</i>        | 4.12  |
| <i>Sphingomonas</i>       | 1.28  |

|                             |       |
|-----------------------------|-------|
| <i>Sphingopyxis</i>         | 2.89  |
| unclassified                | 0.07  |
| unclassified                | 0.07  |
| <i>Polymorphum</i>          | 0.07  |
| Betaproteobacteria          | 39.32 |
| Burkholderiales             | 38.92 |
| Alcaligenaceae              | 13.08 |
| <i>Achromobacter</i>        | 11.07 |
| <i>Bordetella</i>           | 1.87  |
| <i>Castellaniella</i>       | 0.11  |
| <i>Pigmentiphaga</i>        | 0.03  |
| Burkholderiaceae            | 8.91  |
| <i>Burkholderia</i>         | 0.85  |
| <i>Cupriavidus</i>          | 6.99  |
| <i>Pandoraea</i>            | 0.10  |
| <i>Paraburkholderia</i>     | 0.04  |
| <i>Ralstonia</i>            | 0.93  |
| Comamonadaceae              | 15.08 |
| <i>Acidovorax</i>           | 2.62  |
| <i>Alicyciphilus</i>        | 0.62  |
| <i>Comamonas</i>            | 0.26  |
| <i>Curvibacter</i>          | 0.01  |
| <i>Delftia</i>              | 6.19  |
| <i>Hydrogenophaga</i>       | 0.93  |
| <i>Limnohabitans</i>        | 0.02  |
| Other                       | 0.02  |
| <i>Ottowia</i>              | 0.01  |
| <i>Polaromonas</i>          | 0.19  |
| <i>Ramlibacter</i>          | 0.85  |
| <i>Rhodoferax</i>           | 0.97  |
| <i>Variovorax</i>           | 2.29  |
| <i>Verminephrobacter</i>    | 0.10  |
| Oxalobacteraceae            | 0.31  |
| <i>Collimonas</i>           | 0.03  |
| <i>Herbaspirillum</i>       | 0.08  |
| <i>Janthinobacterium</i>    | 0.05  |
| <i>Massilia</i>             | 0.14  |
| unclassified                | 1.47  |
| <i>Aquabacterium</i>        | 0.04  |
| <i>Leptothrix</i>           | 0.37  |
| <i>Methylibium</i>          | 0.45  |
| <i>Mitsuaria</i>            | 0.17  |
| <i>Roseateles</i>           | 0.13  |
| <i>Rubrivivax</i>           | 0.32  |
| unclassifiedBurkholderiales | 0.06  |



|                           |       |
|---------------------------|-------|
| <i>Paucibacter</i>        | 0.06  |
| unclassified              | 0.02  |
| <i>Thiomonas</i>          | 0.02  |
| Neisseriales              | 0.10  |
| Chromobacteriaceae        | 0.10  |
| <i>Chromobacterium</i>    | 0.04  |
| <i>Jeongeupia</i>         | 0.02  |
| <i>Pseudogulbenkiania</i> | 0.02  |
| <i>Vogesella</i>          | 0.02  |
| Nitrosomonadales          | 0.05  |
| Sterolibacteriaceae       | 0.05  |
| <i>Methyloversatilis</i>  | 0.04  |
| <i>Sulfuritalea</i>       | 0.01  |
| Rhodocyclales             | 0.23  |
| Azonexaceae               | 0.02  |
| <i>Dechloromonas</i>      | 0.02  |
| Rhodocyclaceae            | 0.02  |
| <i>Dechlorosoma</i>       | 0.02  |
| Zoogloeaceae              | 0.19  |
| <i>Azoarcus</i>           | 0.12  |
| <i>Thauera</i>            | 0.07  |
| unclassified              | 0.02  |
| unclassified              | 0.02  |
| Betaproteobacteria        | 0.02  |
| Deltaproteobacteria       | 0.35  |
| Myxococcales              | 0.35  |
| Anaeromyxobacteraceae     | 0.01  |
| <i>Anaeromyxobacter</i>   | 0.01  |
| Myxococcaceae             | 0.03  |
| <i>Myxococcus</i>         | 0.03  |
| Polyangiaceae             | 0.31  |
| <i>Polyangium</i>         | 0.30  |
| <i>Sorangium</i>          | 0.01  |
| Gammaproteobacteria       | 27.28 |
| Aeromonadales             | 0.01  |
| Aeromonadaceae            | 0.01  |
| <i>Aeromonas</i>          | 0.01  |
| Chromatiales              | 0.01  |
| Ectothiorhodospiraceae    | 0.01  |
| <i>Thioalkalivibrio</i>   | 0.01  |
| Enterobacterales          | 0.04  |
| Enterobacteriaceae        | 0.03  |
| <i>Klebsiella</i>         | 0.03  |
| Yersiniaceae              | 0.02  |
| <i>Serratia</i>           | 0.02  |

|                          |       |
|--------------------------|-------|
| Immundisolibacterales    | 0.01  |
| Immundisolibacteraceae   | 0.01  |
| <i>Immundisolibacter</i> | 0.01  |
| Legionellales            | 0.14  |
| Legionellaceae           | 0.14  |
| <i>Legionella</i>        | 0.12  |
| <i>Tatlockia</i>         | 0.02  |
| Oceanospirillales        | 0.05  |
| Alcanivoracaceae         | 0.02  |
| <i>Alcanivorax</i>       | 0.02  |
| Halomonadaceae           | 0.03  |
| <i>Halomonas</i>         | 0.02  |
| <i>Halotalea</i>         | 0.01  |
| Pseudomonadales          | 15.64 |
| Pseudomonadaceae         | 15.64 |
| <i>Azotobacter</i>       | 0.11  |
| <i>Pseudomonas</i>       | 15.53 |
| Xanthomonadales          | 11.36 |
| Rhodanobacteraceae       | 3.54  |
| <i>Dokdonella</i>        | 3.45  |
| <i>Dyella</i>            | 0.06  |
| <i>Rhodanobacter</i>     | 0.03  |
| Xanthomonadaceae         | 7.82  |
| <i>Luteimonas</i>        | 0.02  |
| <i>Lysobacter</i>        | 0.20  |
| <i>Pseudoxanthomonas</i> | 0.14  |
| <i>Stenotrophomonas</i>  | 7.19  |
| <i>Xanthomonas</i>       | 0.28  |
| <b>Other</b>             | 1.68  |
