# Supplementary material for: Metagenomic Insights into the Bacterial Functions of a Diesel-Degrading Consortium for the Rhizoremediation of Diesel-Polluted Soil
Source: MDPI journal article supplement (doi:10.3390/genes10060456), 2019-06-14

**Supplementary Figure S1.** Growth curves of the diesel-degrading consortium in each of the substrates used in this study. Growth was measured by  $OD_{600\text{ nm}}$  in 10 mL of MM+PAS supplemented with 0.005 (w/v) of yeast extract and 1g/L of each substrate. The lines represent mean values over three replicates.

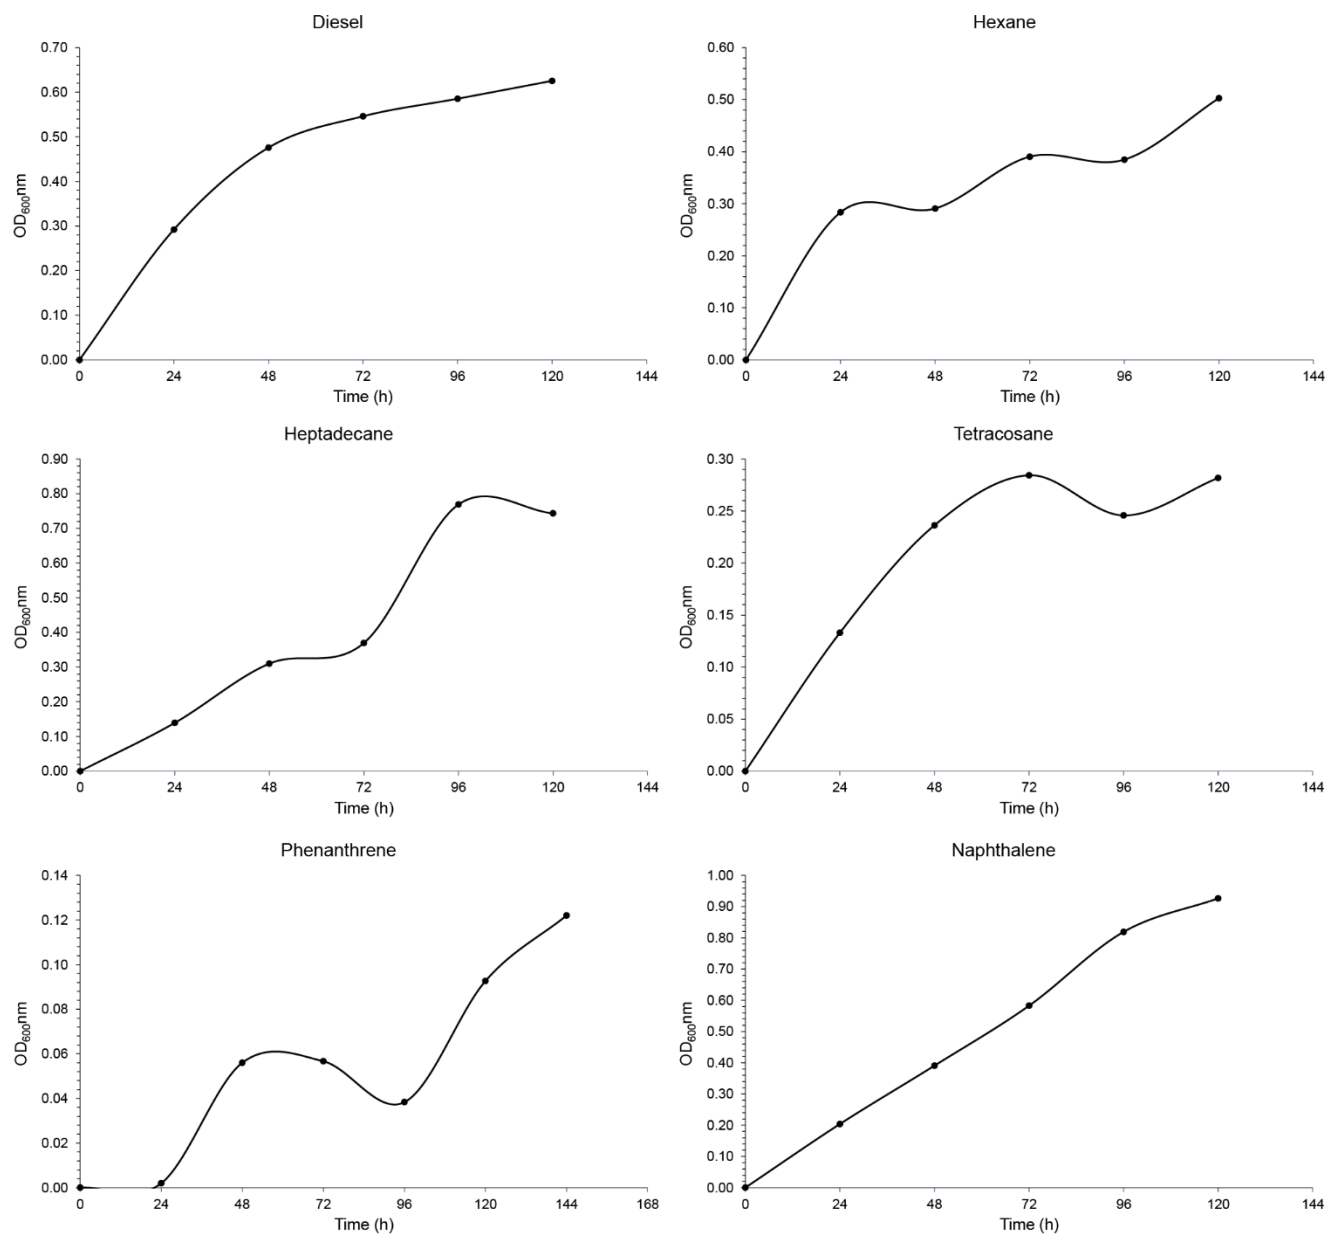

Supplement: s1 [file s1]
