# Supplementary material for: Metagenomic Insights into the Bacterial Functions of a Diesel-Degrading Consortium for the Rhizoremediation of Diesel-Polluted Soil
Source: MDPI journal article supplement (doi:10.3390/genes10060456), 2019-06-14
Supplement: s1 [file s1]

**Supplementary Table S2.** Statistics of the 16S rRNA microbiome sequencing and processing of reads

|                      | 16S rRNA |         |             |             |             |              |
|----------------------|----------|---------|-------------|-------------|-------------|--------------|
|                      | Diesel   | Hexane  | Heptadecane | Tetracosane | Naphthalene | Phenanthrene |
| Paired-end raw reads | 112,255  | 193,494 | 165,502     | 126,957     | 84,263      | 139,585      |
| Trimmed reads        | 107,885  | 186,487 | 161,310     | 123,670     | 80,833      | 135,330      |
| Processed data       |          |         |             |             |             |              |
| Filtered             | 46,341   | 124,290 | 106,631     | 80,773      | 57,154      | 93,605       |
| Denoised             | 46,259   | 124,088 | 106,581     | 80,706      | 57,086      | 93,524       |
| Merged               | 45,805   | 122,342 | 106,394     | 78,213      | 55,737      | 93,404       |
| Non-chimeric         | 45,488   | 115,347 | 105,747     | 77,581      | 55,737      | 79,263       |
| Total ASVs           | 76       | 29      | 45          | 45          | 20          | 34           |

Statistics of the whole-metagenome shotgun sequencing and processing of reads

| Whole-metagenome shotgun |             |
|--------------------------|-------------|
| Paired-end raw reads     | 4,251,428   |
| Trimmed reads            | 4,130,449   |
| Processed data           |             |
| Total contigs            | 114,357     |
| Contigs > 1Kb            | 18,473      |
| Largest contig (pb)      | 823,847     |
| Total length (bp)        | 140,012,582 |
| N50                      | 3,237       |
| GC%                      | 64.03       |
| N's                      | 0           |
| CDSs                     | 120,867     |
| Assigned CDSs            | 78,110      |
| 16S rDNA                 | 53          |
