# Supplementary material for: Metagenomic Insights into the Bacterial Functions of a Diesel-Degrading Consortium for the Rhizoremediation of Diesel-Polluted Soil
Source: Genes (Basel). 2019 Jun 14;10(6):456. doi: 10.3390/genes10060456 (PMC6627497; doi:10.3390/genes10060456)
Supplement: Supplementary file 1 [file genes-10-00456-s001.zip]

Archive with 5 entries (5 files):
- Supplementary_Figure_S1.pdf
- Supplementary_Figure_S2.pdf
- Supplementary_Table_S1.pdf
- Supplementary_Table_S2.pdf
- Supplementary_Table_S3.pdf
